# Supplementary material
Source: publisher site journal article supplement (https://www.dovepress.com/article/269766)
Supplement: Supplementary file 1 [file get_supplementary_file.php]

## MRR annotated genes of Fig.S1

| Location           | Size(bp) | Feature                                            | Directionality |
|--------------------|----------|----------------------------------------------------|----------------|
| 76,425...76,561    | 137      | $\Delta$ Tn2                                       |                |
| 76,562...77,380    | 819      | $\Delta$ IS26                                      |                |
| 77,381...78,715    | 1335     | $\Delta$ Tn2                                       |                |
| 78, 851...80,195   | 1345     | $\Delta$ TnAs3                                     |                |
| 80,383...81,202    | 820      | IS26                                               | →              |
| 81,242...81,748    | 507      | hypothetical protein                               | →              |
| 81,748...82,374    | 627      | hypothetical protein                               | →              |
| 82,380...82,574    | 195      | hypothetical protein                               | ←              |
| 82,610...82,732    | 123      | hypothetical protein                               | →              |
| 82,879...83,754    | 876      | <i>bla</i> CTX-M-65                                | →              |
| 83,760...84,813    | 1054     | $\Delta$ IS903B                                    |                |
| 84,886...85,911    | 1026     | tonB-dependent receptor <i>yncD</i> precursor      | →              |
| 85,886...86,335    | 450      | Methyl-accepting chemotaxis sensor/transducer      | ←              |
| 86,456...87,274    | 819      | IS1006                                             | ←              |
| 87,275...88,119    | 845      | $\Delta$ ISVsa3                                    |                |
| 88,137...89,021    | 885      | Type IV secretory pathway                          | →              |
| 89,238...90,452    | 1215     | Chloramphenicol/florfenicol resistance <i>flor</i> | →              |
| 90,480...90,785    | 306      | LysR family                                        | →              |
| 91,427...92,403    | 977      | ISVsa3                                             | →              |
| 92,566...92,868    | 303      | Phosphoglucosamine mutase                          | ←              |
| 92,955...93,818    | 864      | <i>sulI</i>                                        | ←              |
| 93,789...94,968    | 1180     | ISAbal                                             | →              |
| 95,147...95,632    | 486      | <i>dmpL</i>                                        | ←              |
| 95,670...95,804    | 135      | <i>dmpK</i>                                        | ←              |
| 95,825...97,359    | 1535     | $\Delta$ Tn5393                                    |                |
| 97,360...98,250    | 891      | ISEc59                                             | →              |
| 98,617...99,642    | 1026     | <i>aph(4)-Ia</i>                                   | ←              |
| 99,629...99,850    | 222      | hypothetical protein                               | ←              |
| 99,871...100,647   | 777      | <i>aac(3)-VI</i>                                   | ←              |
| 100,698...101,517  | 820      | IS26                                               | →              |
| 101,564...102,163  | 600      | <i>aac(6')-II</i>                                  | →              |
| 102, 294...103,124 | 831      | <i>bla</i> OXA-1                                   | →              |
| 103,262...103,894  | 633      | <i>catB</i>                                        | →              |
| 103,979...104,431  | 453      | <i>arr3</i>                                        | →              |
| 104,654...105,001  | 348      | <i>qacE</i> $\Delta$ 1                             | →              |
| 104,995...105,834  | 840      | <i>sulI</i>                                        | →              |
| 105,962...106,165  | 204      | hypothetical protein                               | →              |
| 106,231...107,050  | 820      | IS26                                               | ←              |
| 107,051...108,598  | 1548     | $\Delta$ TnAs1                                     |                |
| 108,623...108,865  | 243      | $\Delta$ Tn3                                       |                |
| 108,897...109,547  | 651      | <i>tetR</i>                                        | ←              |
| 109,653...110,852  | 1200     | <i>tetA</i>                                        | →              |

|                   |      |                                          |   |
|-------------------|------|------------------------------------------|---|
| 110,884...111,768 | 885  | putative inner membrane transporter YedA | ← |
| 111,906...112,298 | 393  | hypothetical protein                     | ← |
| 112,301...114,086 | 1786 | <i>ΔTnAs1</i>                            |   |

### MRR annotated genes of Fig.S2

| Location     | Size(bp) | Feature                            | Directionality |
|--------------|----------|------------------------------------|----------------|
| 1..375       | 375      | <i>repB</i>                        | →              |
| 551..913     | 363      | hypothetical protein               | →              |
| 1032..1454   | 423      | DNA distortion protein 3           | →              |
| 1475..1759   | 285      | hypothetical protein               | ←              |
| 1795..2106   | 312      | hypothetical protein               | ←              |
| 2312..2623   | 312      | hypothetical protein               | ←              |
| 2696..3358   | 663      | hypothetical protein               | ←              |
| 3739..4401   | 663      | resolvase                          | →              |
| 4462..5777   | 1316     | <i>ISKox3</i>                      | ←              |
| 6054..6410   | 357      | hypothetical protein               | →              |
| 6392..7211   | 820      | <i>IS26</i>                        | ←              |
| 7346..8377   | 1032     | <i>tat</i>                         | →              |
| 8388..9026   | 639      | <i>trpF</i>                        | ←              |
| 9031..9396   | 366      | <i>ble</i>                         | ←              |
| 9400..10212  | 813      | <i>blaNDM-5</i>                    | ←              |
| 10306..10355 | 50       | IRR of <i>ISAba125</i>             |                |
| 10379..11573 | 1195     | <i>IS5</i>                         | →              |
| 11574..12591 | 1018     | <i>ΔISAba125</i>                   |                |
| 12542..12591 | 50       | IRL of <i>ISAba125</i>             |                |
| 12681..15916 | 3236     | <i>IS3000</i>                      | ←              |
| 15917..16496 | 580      | <i>ΔTn2</i>                        |                |
| 16682..16807 | 126      | hypothetical protein               | ←              |
| 17209..17409 | 201      | hypothetical protein               | →              |
| 17439..17585 | 147      | hypothetical protein               | ←              |
| 17582..17860 | 279      | hypothetical protein               | ←              |
| 17857..18132 | 276      | hypothetical protein               | ←              |
| 18150..18404 | 255      | hypothetical protein               | ←              |
| 18514..19335 | 822      | zinc metalloproteinase Mpr protein | ←              |
| 19508..19684 | 177      | hypothetical protein               | ←              |
| 19784..20434 | 651      | hypothetical protein               | →              |
| 20472..20927 | 456      | hypothetical protein               | ←              |
| 20939..23266 | 2328     | <i>topB</i>                        | ←              |
| 23270..24532 | 1263     | <i>ftsH</i>                        | ←              |
| 24581..25108 | 528      | putative nuclease                  | ←              |
| 25105..25431 | 327      | hypothetical protein               | ←              |
| 25590..25802 | 213      | <i>kikA</i>                        | ←              |
| 25961..26278 | 318      | hypothetical protein               | ←              |
| 26297..28132 | 1836     | <i>virD4</i>                       | ←              |

|              |      |                      |   |
|--------------|------|----------------------|---|
| 28135..29169 | 1035 | <i>virB11</i>        | ← |
| 29166..29363 | 198  | hypothetical protein | ← |
| 29365..29619 | 255  | <i>virB10</i>        | ← |
| 29616..30578 | 963  | hypothetical protein | ← |
| 30575..31498 | 924  | <i>virB9</i>         | ← |
| 31510..32238 | 729  | <i>virB8</i>         | ← |
| 32433..33488 | 1056 | hypothetical protein | ← |
| 33500..33757 | 258  | <i>traG</i>          | ← |
| 33767..34537 | 771  | <i>virB5</i>         | ← |
| 34547..35734 | 1188 | <i>virB4</i>         | ← |
| 35757..36290 | 534  | <i>virB4</i>         | ← |
| 36467..37294 | 828  | hypothetical protein | ← |
| 37319..37609 | 291  | <i>virB2</i>         | ← |
| 37720..38235 | 516  | <i>virB1</i>         | ← |
| 38514..39116 | 603  | hypothetical protein | ← |
| 39328..40107 | 780  | <i>traR</i>          | ← |
| 40119..40484 | 366  | <i>traR</i>          | ← |
| 40468..41100 | 633  | <i>taxA</i>          | ← |
| 41372..41629 | 258  | hypothetical protein | ← |
| 41865..42203 | 339  | hypothetical protein | ← |
| 42529..42798 | 270  | hypothetical protein | ← |
| 42807..43199 | 393  | hypothetical protein | ← |
| 43416..43607 | 192  | hypothetical protein | ← |
| 43709..44062 | 354  | <i>dnaJ</i>          | ← |
| 44205..44414 | 210  | hypothetical protein | → |
| 44475..44630 | 156  | hypothetical protein | → |
| 44982..46685 | 1704 | <i>ISSboI</i>        | → |
| 47262..47525 | 264  | hypothetical protein | → |

### MRR annotated genes of Fig.S3

| Location   | Size(bp) | Feature                             | Directionality |
|------------|----------|-------------------------------------|----------------|
| 1..873     | 873      | <i>repA</i>                         | →              |
| 886..1290  | 405      | hypothetical protein                | →              |
| 1425..1952 | 528      | hypothetical protein                | →              |
| 2343..3065 | 723      | <i>pap</i>                          | ←              |
| 3137..4612 | 1476     | <i>mcr-1</i>                        | ←              |
| 4936..5565 | 630      | hypothetical protein                | ←              |
| 5726..5995 | 270      | hypothetical protein                | ←              |
| 6070..6717 | 648      | cobyrinic acid a,c-diamide synthase | ←              |
| 7131..7310 | 180      | hypothetical protein                | ←              |
| 7855..7974 | 120      | hypothetical protein                | ←              |
| 8206..8255 | 50       | <i>IRR of IS26</i>                  |                |
| 8304..8930 | 627      | <i>ΔIS26</i>                        | ←              |
| 8944..8993 | 50       | <i>IRL of IS26</i>                  |                |

|              |      |                                               |   |
|--------------|------|-----------------------------------------------|---|
| 9017..9481   | 465  | DNA-binding protein H-NS                      | ← |
| 9499..9705   | 207  | Haemolysin expression modulating protein      | ← |
| 9702..11855  | 2154 | <i>topB</i>                                   | ← |
| 11860..12432 | 573  | DNA topoisomerase III                         | ← |
| 12436..12582 | 147  | <i>ftsH</i>                                   | ← |
| 12743..13048 | 306  | IncN plasmid KikA protein                     | ← |
| 13032..13451 | 420  | cag pathogenicity island Cag12 family protein | ← |
| 13463..15325 | 1863 | <i>traG</i>                                   | ← |
| 15312..16340 | 1029 | <i>virB11</i>                                 | ← |
| 16342..17460 | 1119 | <i>virB10</i>                                 | ← |
| 17453..18358 | 906  | <i>virB9</i>                                  | ← |
| 18358..19044 | 687  | hypothetical protein                          | ← |
| 19037..19165 | 129  | conjugal transfer protein                     | ← |
| 19178..19381 | 204  | hypothetical protein                          | ← |
| 19383..19562 | 180  | hypothetical protein                          | ← |
| 19559..20653 | 1095 | <i>triE</i>                                   | ← |
| 20665..21381 | 717  | <i>virB5</i>                                  | ← |
| 21393..24140 | 2748 | <i>virB4</i>                                  | ← |
| 24159..24485 | 327  | <i>triB</i>                                   | ← |
| 24499..25119 | 621  | <i>virB1</i>                                  | ← |
| 25122..25298 | 177  | hypothetical protein                          | ← |
| 25475..25690 | 216  | <i>traG</i>                                   | ← |
| 25687..25980 | 294  | LuxR family transcriptional regulator         | ← |
| 26057..27286 | 1230 | <i>traR</i>                                   | ← |
| 27290..27793 | 504  | <i>orf8</i>                                   | ← |
| 28016..28141 | 126  | hypothetical protein                          | → |
| 28154..28501 | 348  | DNA repair protein HicB                       | ← |
| 28498..28746 | 249  | <i>hicA</i>                                   | ← |
| 28838..28975 | 138  | hypothetical protein                          | ← |
| 29051..29401 | 351  | hypothetical protein                          | ← |
| 29492..29791 | 300  | hypothetical protein                          | ← |
| 29793..30152 | 360  | <i>dnaJ</i>                                   | ← |
| 30245..30472 | 228  | hypothetical protein                          | ← |
| 30459..30710 | 252  | hypothetical protein                          | ← |
| 30707..31249 | 543  | hypothetical protein                          | ← |
| 31354..31869 | 516  | <i>dnaJ</i>                                   | ← |
| 32007..32159 | 153  | hypothetical protein                          | ← |
| 32704..32829 | 126  | hypothetical protein                          | → |
| 33073..33189 | 117  | hypothetical protein                          | ← |
